# Supplementary material
Source: PubMed Central journal article supplement (PMC4461029)

Supplementary Figure 1. Liver SCD-1 in DIO mice by real time PCR, results normalized to 18s (A) and Western Blot, each lane represents one animal (B). \*  $p < 0.05$  between chronic intermittent hypoxia (CIH) and control (C)

**A.**

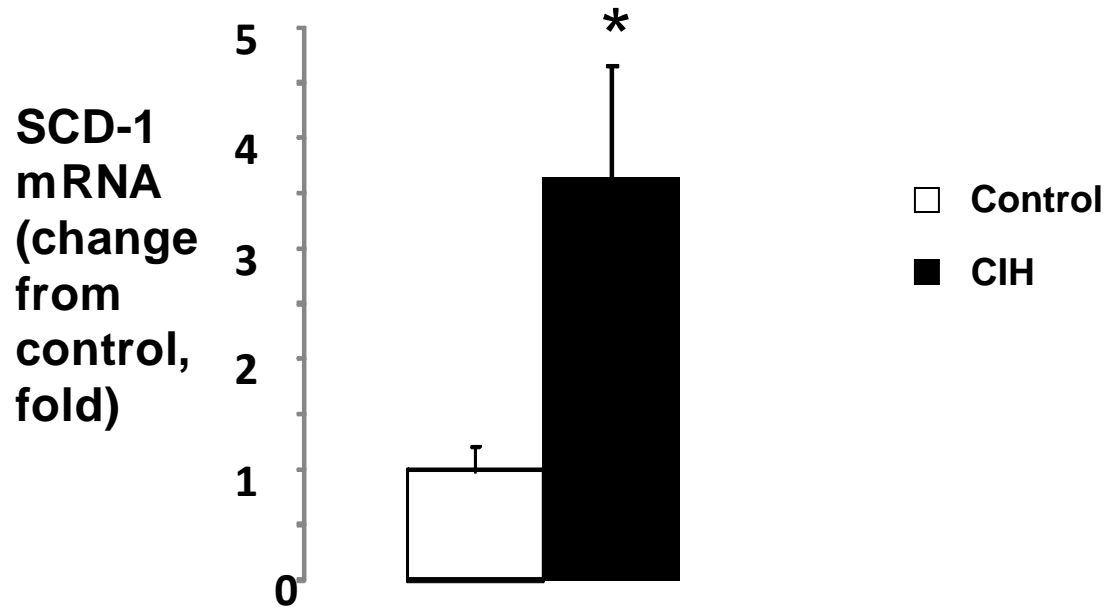

**B.**

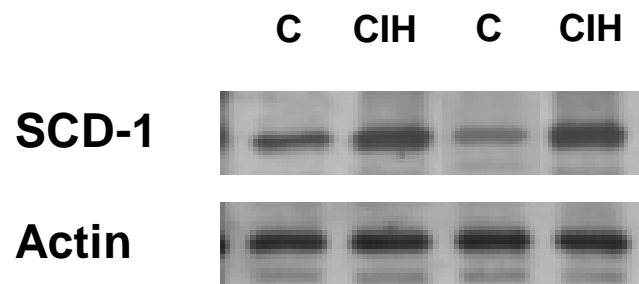

Supplement: NIHMS696498-supplement-Supplement.pdf [file NIHMS696498-supplement-Supplement.pdf]
